# Supplementary material for: Simple and fast screening for structure-selective G-quadruplex ligands
Source: Royal Society of Chemistry journal article supplement (doi:10.1039/d3cc00556a), 2023-01-01
Supplement: d3cc00556a1.pdf [file d3cc00556a1.pdf]

1 Electronic Supplementary Material (ESI) for ChemCommn.

2 This journal is © The Royal Society of Chemistry 2022

3  
4  
5  
6 **Supporting Information**

7  
8  
9 **Simple and fast screening for structure-selective G-quadruplex ligands**

10  
11 Yoshiki Hashimoto,<sup>a</sup> Yoshiki Imagawa,<sup>a</sup> Nagisa Takamiya,<sup>a</sup> Kaho Nagano,<sup>a</sup> Ryuichi Maeda,<sup>a</sup> Naho Nagahama,<sup>a</sup>  
12 Takeru Torii,<sup>a</sup> Natsuki Kinoshita,<sup>a</sup> Keiko Kawauchi,<sup>a</sup> Hisae Tatesishi-Karimata,<sup>b</sup> Naoki Sugimoto<sup>a, b</sup>  
13 and Daisuke Miyoshi<sup>\*a</sup>

14  
15  
16  
17  
18  
19 **Table Contents**

20  
21 Experimental Procedures

|    |                                 |          |
|----|---------------------------------|----------|
| 22 | Materials                       | p2       |
| 23 | Fluorescent spectroscopy        | p2       |
| 24 | ThT-displacement assay          | p2       |
| 25 | T7 RNA polymerase stop assay    | p2       |
| 26 | Circular dichroism spectroscopy | p3       |
| 27 | Cell culture                    | p3       |
| 28 | Cytotoxicity assay              | p3       |
| 29 | Table S1 and S2                 | p4 ~ p5  |
| 30 | Figure S1~S9                    | p6 ~ p15 |
| 31 | References                      | p16      |

## 33 Experimental Procedures

### 34 Materials

35 All oligonucleotides were purchased from Sigma-Aldrich Co. LLC (St. Louis, Missouri, U.S.A.). ThT  
36 was purchased from Wako Pure Chemical Industries Ltd. (Osaka, Japan) and used without further  
37 purification. In-house library compounds were purchased from Wako Pure Chemical Industries Ltd.  
38 and Tokyo Chemical Industry Co., Ltd. (Tokyo, Japan). 22AG is an oligonucleotide derived from the  
39 human telomeric repeat: [5'-A(GGGTTA)3GGG-3'] ( $\epsilon_{260} = 228,500 \text{ M}^{-1} \text{ cm}^{-1}$ ). Extinction coefficients  
40 for single-strand DNA were calculated from mono and dinucleotide data using the nearest-neighbor  
41 approximation model<sup>1</sup>. The stock solutions of oligonucleotides were stored at -20 °C. Single-strand  
42 concentrations of the oligonucleotides were determined by measuring the absorbance at 260 nm at 90  
43 °C.

44 The stock solution of ThT (100  $\mu\text{M}$  in Milli-Q) was stored at 4 °C in the dark. ThT concentration was  
45 determined by measuring the absorbance at 412 nm (extinction coefficient  $\epsilon = 32,000 \text{ M}^{-1} \text{ cm}^{-1}$ )<sup>2</sup>.  
46 Before being used, the oligonucleotides in a buffer consisting of 50 mM 2-(*N*-morpholino)  
47 ethanesulfonate (MES)-LiOH (pH 7.0) and 100 mM KCl were heated at 90 °C for 5 min, gently cooled  
48 at -0.5 °C min<sup>-1</sup>, and incubated at 25 °C.

### 51 Fluorescence spectroscopy

52 Fluorescence spectra of ThT were measured using a Varioskan LUX (Thermo Fisher Scientific K. K.,  
53 Waltham, Massachusetts, U.S.A.) with a 96-well plate (Sumitomo Bakelite Co., Ltd., Tokyo, Japan).  
54 The fluorescence spectra were measured from 470 nm to 600 nm. All experiments were performed in  
55 buffer consisting of 100 mM KCl and 50 mM MES-LiOH (pH 7.0) at 25 °C. The excitation wavelength  
56 was 450 nm. The oligonucleotides were titrated into 20  $\mu\text{M}$  ThT. The values of fluorescence intensity  
57 at 485 nm ( $F_{485}$ ) were plotted against the concentration of the oligonucleotide, and were fitted with  
58 the following equation using KaleidaGraph (Synergy Software, U.S.A.) to evaluate the dissociation  
59 constants of ThT ( $K_{d-\text{ThT}}$ ) for 22AG:

$$60 \quad F_{485} = a \frac{([\text{DNA}] + [\text{ThT}] + K_{d-\text{ThT}}) - \sqrt{([\text{DNA}] + [\text{ThT}] + K_{d-\text{ThT}})^2 - 4[\text{DNA}][\text{ThT}]}}{2[\text{ThT}]} + b$$

61 where  $a$  is the scaling factor and  $b$  is the initial fluorescence intensity at 485 nm.

### 64 ThT-displacement assay

65 Each experiment was performed in a 96-well plate in a buffer consisting of 50 mM LiOH-MES and  
66 100 mM KCl (pH 7.0). The total volume was 60  $\mu\text{L}$ . The ThT displacement assay was conducted as  
67 follows: 5  $\mu\text{M}$  22AG was mixed with 2 mM (as nucleotide concentration) CT-DNA and 20  $\mu\text{M}$  ThT.  
68 The addition of each 20  $\mu\text{M}$  ligand was followed by a 24-hour equilibration period, after which the  
69 fluorescence spectrum of ThT was recorded. The  $K_i$  values of the ligands were calculated with the  
70 following equation:

$$71 \quad I_{\text{Affinity}} = 1 - \frac{[\text{Ligand}]}{[\text{Ligand}] + K_i \left( 1 + \frac{[\text{ThT}]}{K_{d-\text{ThT}}} \right)}$$

72 where  $K_{d-\text{ThT}}$  is the dissociation constant between 22AG and ThT.

### 75 T7 RNA polymerase stop assay

76 Each transcription reaction solution contained 2  $\mu\text{M}$  DNA template, 1 mM KCl, 40 mM Tris-HCl (pH  
77 7.2), and 8 mM MgCl<sub>2</sub>. Note that this KCl concentration was used to reduce the thermal stability of  
78 G4. The samples were heated to 93 °C for 5 min, then cooled -0.5 °C min<sup>-1</sup>. After annealing, NTP and  
79 DTT were added to a final concentration of 1 mM and 5 mM, respectively. T7 RNA polymerase (100  
80 units, Takara Bio, Inc., Shiga, Japan) was added to the reaction buffer to start the reaction. The final  
81 reaction buffer contained 1 mM KCl, 40 mM Tris-HCl (pH 7.2), 8 mM MgCl<sub>2</sub>, and 5 mM DTT. Each  
82 mixture was incubated at 37 °C for 120 min for the reaction. Reactions were quenched by incubation

83 with 10 units of DNase I (Takara Bio, Inc.) for 20 min, then a 10-fold excess volume of transcription  
84 stop solution (80 wt% formamide, 10 mM Na<sub>2</sub>EDTA, and 0.01% blue dextran) was added. Each  
85 sample was cooled rapidly after heating to 93 °C for 5 min. The samples were loaded onto a 10%  
86 polyacrylamide and 7 M urea gel and run at 60 °C. After electrophoresis, the gels were stained with  
87 SYBR Gold (Thermo Fisher Scientific, Inc., Tokyo, Japan) and fluorescent bands were imaged by  
88 FLA-7000 (Fujifilm, Tokyo, Japan). Band intensities were quantified using ImageJ software  
89 distributed by the National Institutes of Health, U.S.A.

90  
91  
92 Circular dichroism spectroscopy

93 CD spectra of DNA oligonucleotides were measured using a J-820 spectropolarimeter (JASCO Co.,  
94 Ltd., Tokyo, Japan) at 5 μM 22AG concentration in 100 mM KCl and 50 mM MES-LiOH (pH 7.0)  
95 buffer. The samples were heated to 90 °C, and then cooled at a rate of -0.5 °C min<sup>-1</sup>. Before  
96 measurement, we added 50 μM ligands to the samples and incubated at 25 °C for 1 hour. The spectra  
97 at 25 °C were obtained using at least three scans between 200 to 350 nm in a cuvette with a path length  
98 of 0.1 cm. For CD melting experiments, samples were heated from 25 °C to 90 °C at a rate of 0.5 °C  
99 min<sup>-1</sup>. Thermal denaturing behavior was traced at 295 nm.

100  
101  
102 Cell culture

103 Human cervical cancer HeLa cells obtained from the American Type Culture Collection were cultured  
104 in Dulbecco's modified Eagle's medium (Nissui Pharmaceutical Co., Ltd., Tokyo, Japan)  
105 supplemented with 10% fetal bovine serum and 1% penicillin/streptomycin. All culture incubations  
106 were performed in a humidified 5% CO<sub>2</sub> incubator at 37 °C.

107  
108  
109 Cytotoxicity assay

110 HeLa cells on 100 mm plastic culture dish (~80% confluence) were trypsinized using 0.1 % (w/v)  
111 trypsin (Wako Pure Chemical Co., Ltd.) and then seeded into a 12-well plate (5 × 10<sup>4</sup> cells in 1 ml).  
112 After incubation for overnight, the cells were treated with 1, 3, 10, 30, or 100 μM of PDS, TMPyP4,  
113 MV, CV, or EV for 48 hours. The number of viable cells was determined by trypan blue exclusion-  
114 based cell staining using trypan blue (Sigma-Aldrich Co. LLC.) with a LUNA cell counter (Shoshin  
115 EM Corp, Okazaki, Japan). The number of the treated cells was normalized to that of nontreated cells.  
116 From plots of cell viability versus various ligand concentration, IC<sub>50</sub> values were calculated with the  
117 following equation:

$$\text{Cell viability} = 1 - \frac{[\text{Ligand}]}{\text{IC}_{50} + [\text{Ligand}]}$$

120 Table S1.  $K_i$  values of compounds with 22AG in the absence or presence of excess DNA duplex at 25 °C.

|                | $K_i$ ( $\mu\text{M}$ ) |               | $I_{\text{Selectivity}}^{[a]}$ |
|----------------|-------------------------|---------------|--------------------------------|
|                | w/o duplex              | w/ duplex     |                                |
| Hemin          | $2.2 \pm 0.2$           | $4.0 \pm 0.3$ | $0.55 \pm 0.03$                |
| Congo red      | $3.6 \pm 0.2$           | $4.3 \pm 0.1$ | $0.83 \pm 0.05$                |
| Ethyl violet   | $3.0 \pm 0.1$           | $5.3 \pm 0.2$ | $0.56 \pm 0.01$                |
| Crystal violet | $1.8 \pm 0.1$           | $5.6 \pm 0.1$ | $0.32 \pm 0.01$                |
| Methyl violet  | $1.0 \pm 0.1$           | $7.8 \pm 0.2$ | $0.13 \pm 0.03$                |

121 [a]  $I_{\text{Selectivity}} = (K_i \text{ with excess DNA duplex}) / (K_i \text{ without excess DNA duplex})$

122

123 Table S2. DNA sequences used in T7 RNA polymerase stop assay.

| Abbreviation                    | Sequences (from 5' to 3')                                                                                      |
|---------------------------------|----------------------------------------------------------------------------------------------------------------|
| 22AG template <sup>[a]</sup>    | <b>GCCGTTTCGTAGTATAGGGTTAGGGTTAGGGTTAGGGCAGA</b><br>GAGAGCACCGAGCCTAGTTCGTGTCATCTCCTATAGTGAGTCG<br>TATTAGTGATC |
| mut22AG template <sup>[a]</sup> | <b>GCCGTTTCGTAGTATAGTGTGAGTGTGGAGTGTGGAGCAGA</b><br>GAGAGCACCGAGCCTAGTTCGTGTCATCTCCTATAGTGAGTCG<br>TATTAGTGATC |
| dsDNA                           | GCAATATTGC                                                                                                     |

124 [a] Bold letters indicate G4 forming region in 22AG template and the corresponding mutated region for mut22AG template.

125

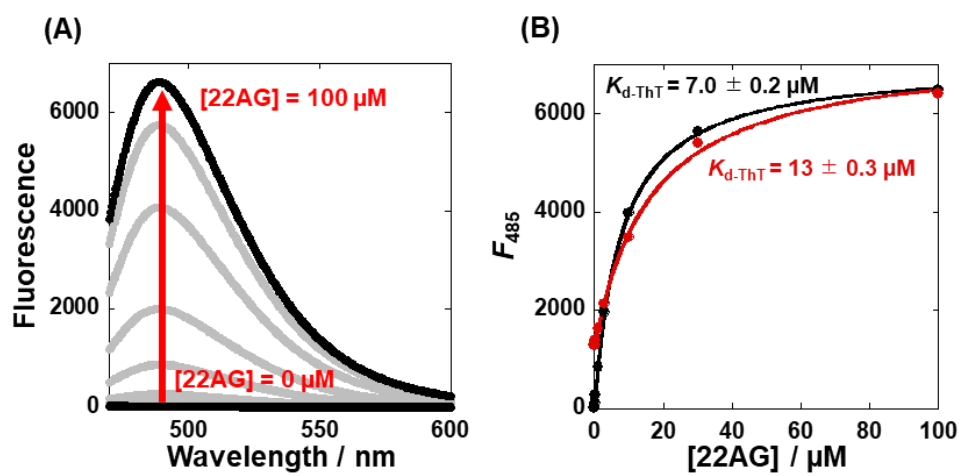

126

127 Figure S1. (A) Fluorescence spectra of 1 μM ThT with 0 to 100 μM of 22AG in the KCl buffer at 25 °C. Ex: 450 nm. (B) Plots of  
 128 fluorescence intensity at 485 nm of 1 μM ThT ( $F_{485}$ ) as a function of [22AG] in the absence (black) or presence (red) of 2 mM CT-  
 129 DNA.  
 130

131

132

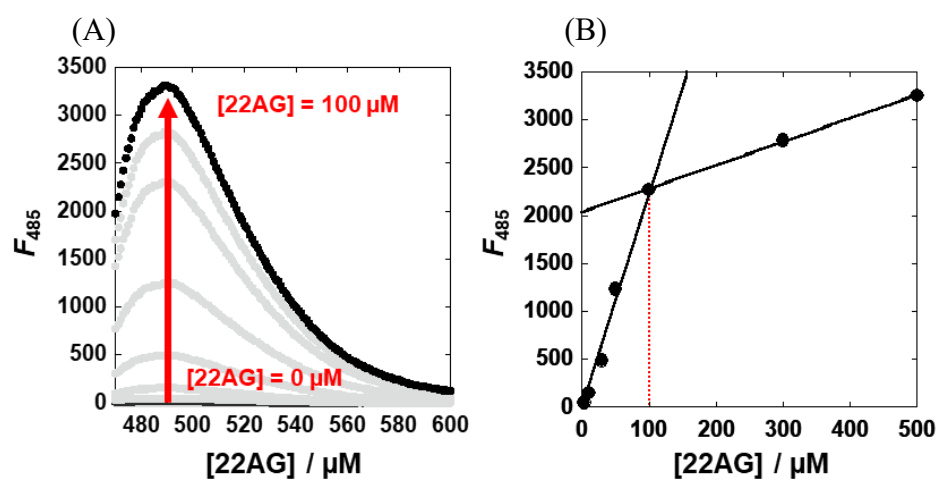

133

134

Figure S2. (A) Fluorescence spectra of 100 μM ThT with 0 to 500 μM of 22AG in the KCl buffer at 25 °C. Ex: 450 nm. (B) Plots of fluorescence intensity at 485 nm of 100 μM ThT ( $F_{485}$ ) as a function of [22AG], showing a clear bending point at 100 μM 22AG.

135

136

137

1. Methyl violet

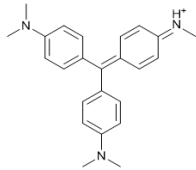

2. Congo red

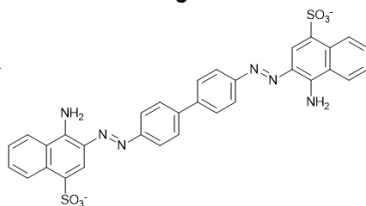

3. Crystal violet

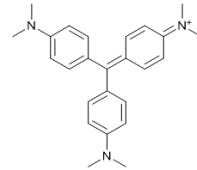

4. Hemin

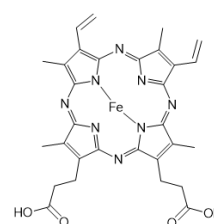

5. Ethyl violet

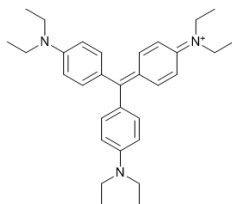

6. Metarrestin

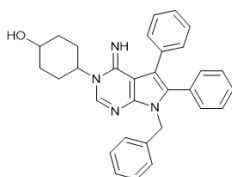

7. Eriochrome black T

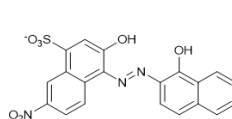

8. Primulin

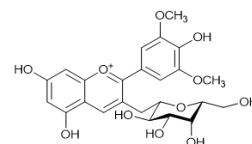

9. CX-5461

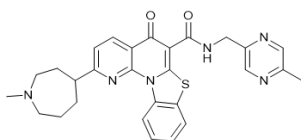

10. Methyl blue

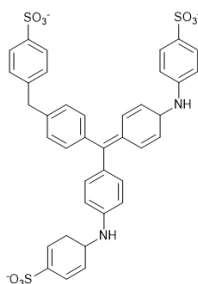

11. Coomassie brilliant blue G-250

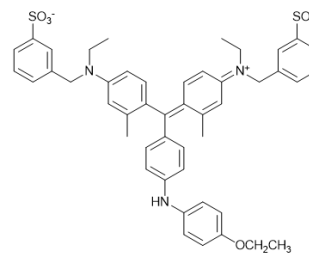

12. Tetranitro Zn (II) phthalocyanine

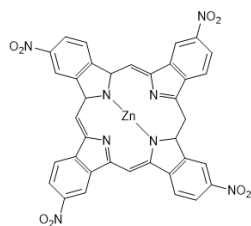

13. Sulfo-Cy7-amine

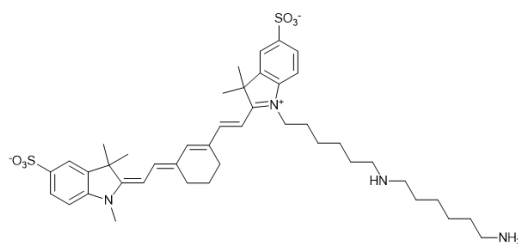

14. Acid red 13

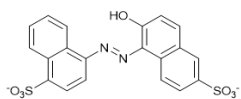

15. Coomassie brilliant blue R-250

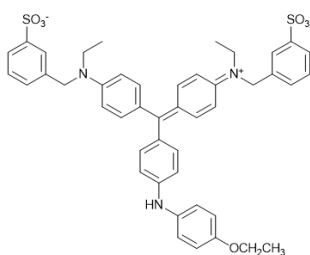

16. Acid red 289

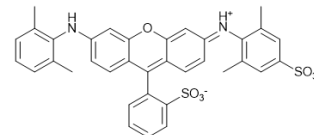

138

139



17. Solvent blue 38

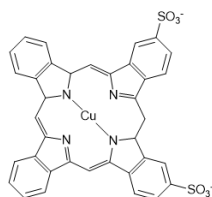

18. Sunset yellow FCF

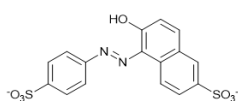

19. Trisulfo-Cy5.5 Alkyne

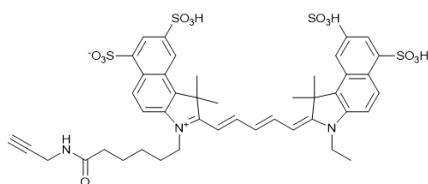

20. Alizarin cyanin green F

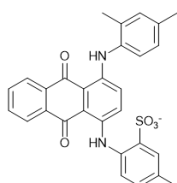

21. Hypericin

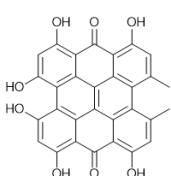

22. Pheoforbide

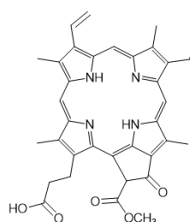

23. Acid orange

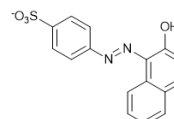

24. Light green SF yellowish

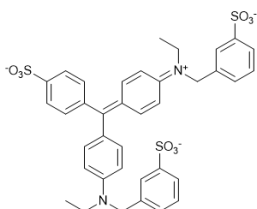

25. Hypocrellin B

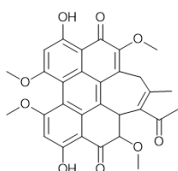

26. BCDA

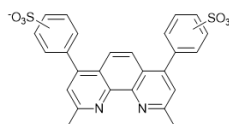

27. Acid yellow 3

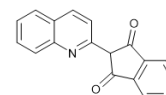

28. Acid blue 1

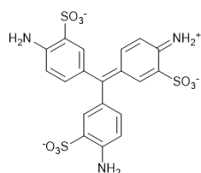

29. Phenol red

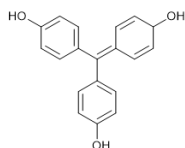

30. Quinizarin Green SS

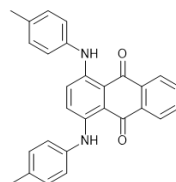

31. Acid green A

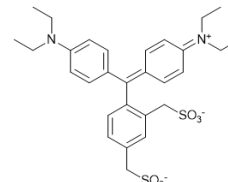

32. Acid blue 1

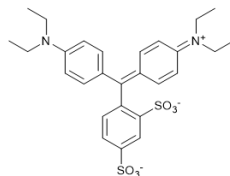

33. Acid red 183

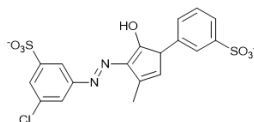

34. Acid red 52

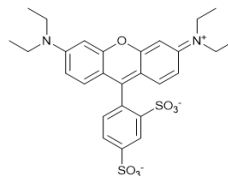

35. Benzyl viologen

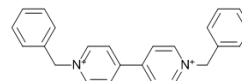

140

141  
142

Figure S3. The chemical structure of the compounds in the in-house library. Compounds are listed in the order of the  $I_{\text{Affinity}}$  value in the absence of excess DNA duplex.

143

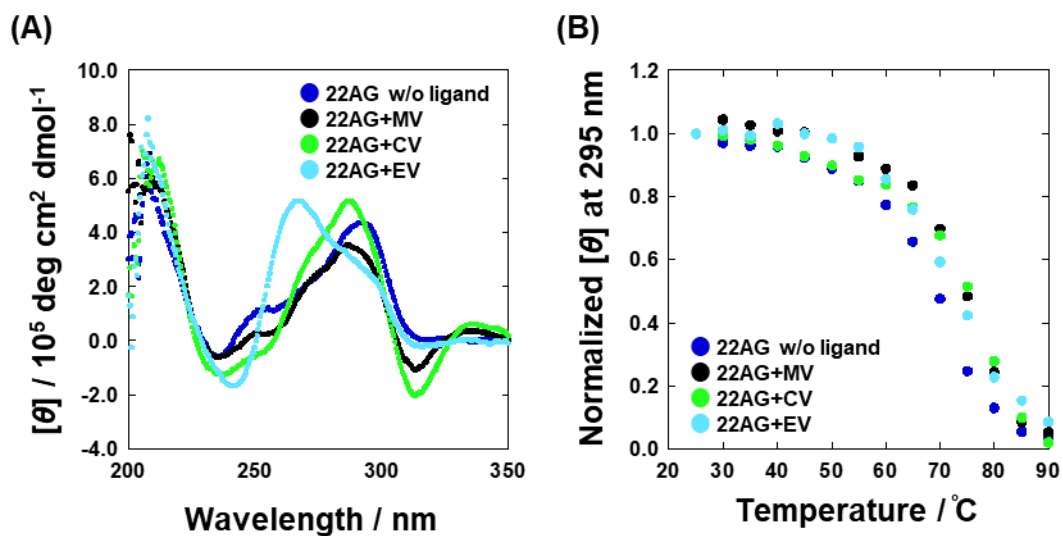

144

145 Figure S4. (A) CD spectra of 5 μM 22AG in the absence of G4 ligand and in the presence of 50 μM MV, CV, or EV at 25 °C in the  
 146 KCl buffer. All CD spectra show two positive peaks around 260 and 295 nm, indicating a mixed G4 in the experimental conditions,  
 147 although a local conformation is altered by the G4 ligands. (B) Normalized CD intensity at 295 nm as a function of temperature for 5  
 148 μM 22AG in the presence of MV, CV, or EV in the KCl buffer. The melting temperatures were 68, 74, 73, and 72 °C in the absence  
 149 or presence of MV, CV, and EV, respectively.

150

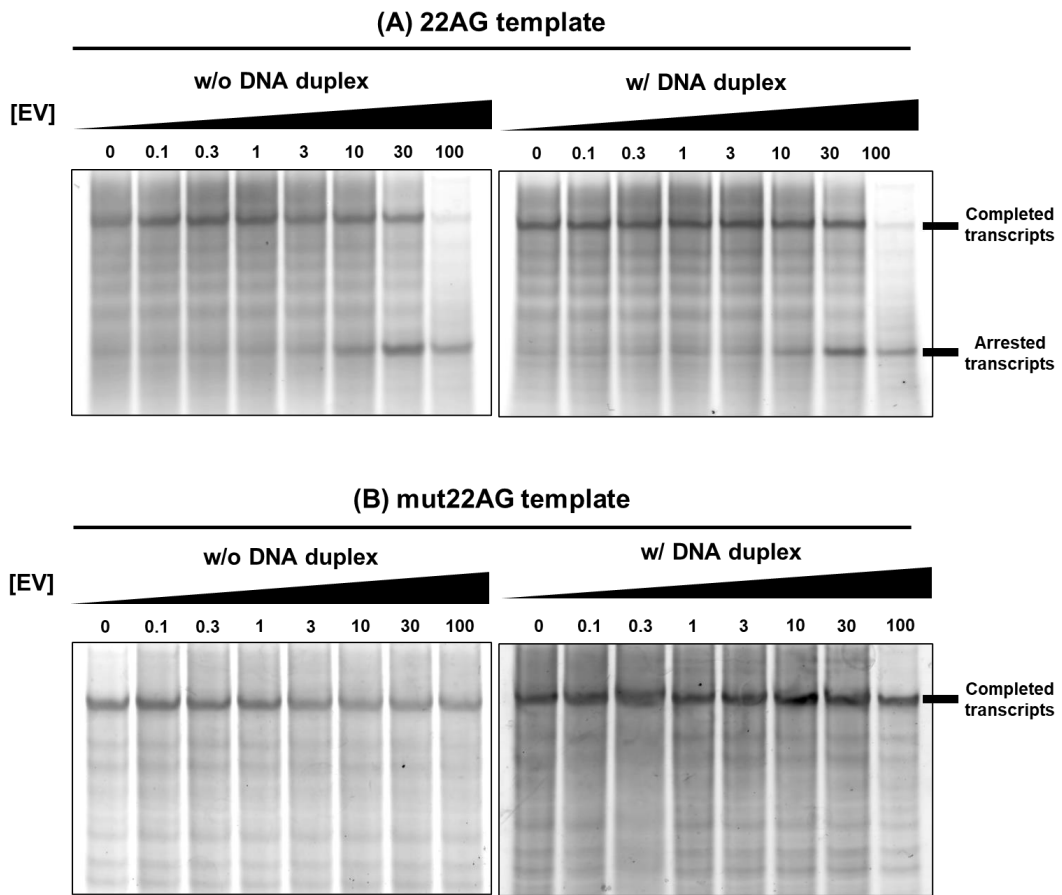

151

152 Figure S5. Denaturing 10% polyacrylamide gel electrophoresis of the transcripts from 22AG template (A) or mut22AG template (B)  
 153 with 0, 0.1, 0.3, 1, 3, 10, 30, or 100  $\mu\text{M}$  EV in the absence (left) or presence (right) of 100  $\mu\text{M}$  dsDNA. The transcription reactions  
 154 were carried out in buffer consisting of 1 mM KCl, 40 mM Tris-HCl (pH 7.2) for 2 hours.

155

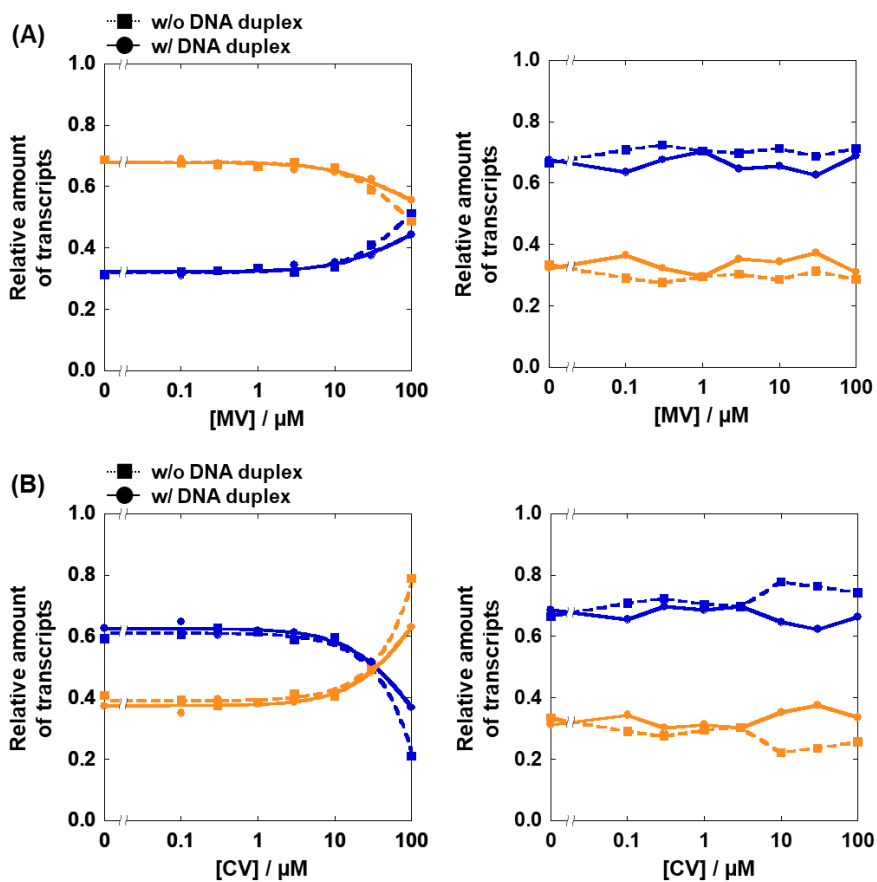

156

157 Figure S6. Relative amounts of the completed transcript (blue) and arrested transcript (orange) from the assay versus concentration of  
 158 EV (A) and CV (B) with the 22AG template (left) or the mut22AG template (right) in the absence (squares with dotted line) or  
 159 presence (circles with continuous line) of excess DNA duplex. Transcription reactions were carried out in buffer consisting of 1 mM  
 160 KCl, 40 mM Tris-HCl (pH 7.2), 8 mM MgCl<sub>2</sub>.

161

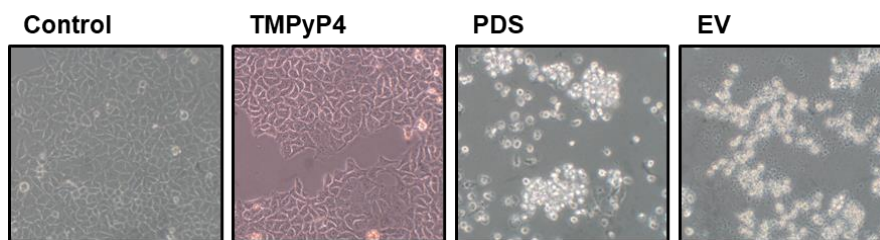

162

163 Figure S7. Images of HeLa cells cultured in medium containing 0 or 100  $\mu$ M TMPyP4, PDS, or EV.

164

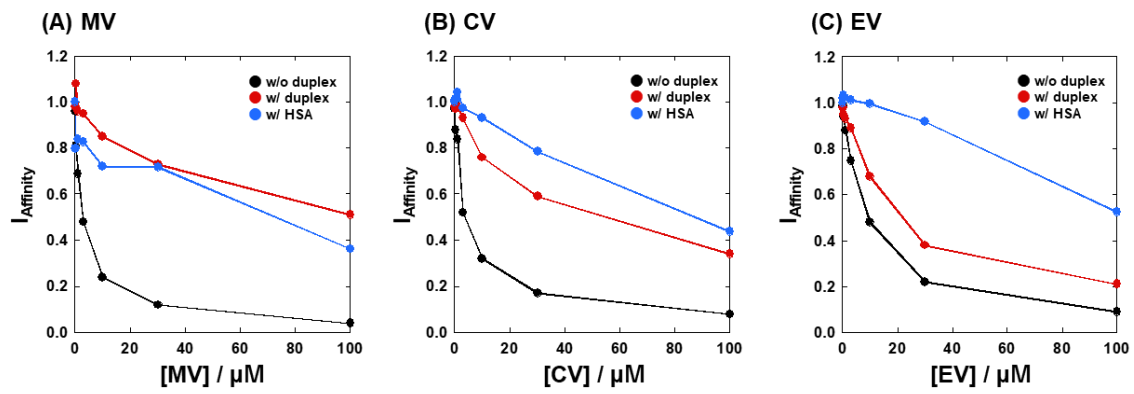

165

166 Figure S8. Plots of  $I_{\text{affinity}}$  values versus the concentrations of MV, CV, and EV in the absence or presence of 2 mM CT-DNA or 50  
 167  $\mu\text{M}$  HSA in the KCl buffer at 25°C

168

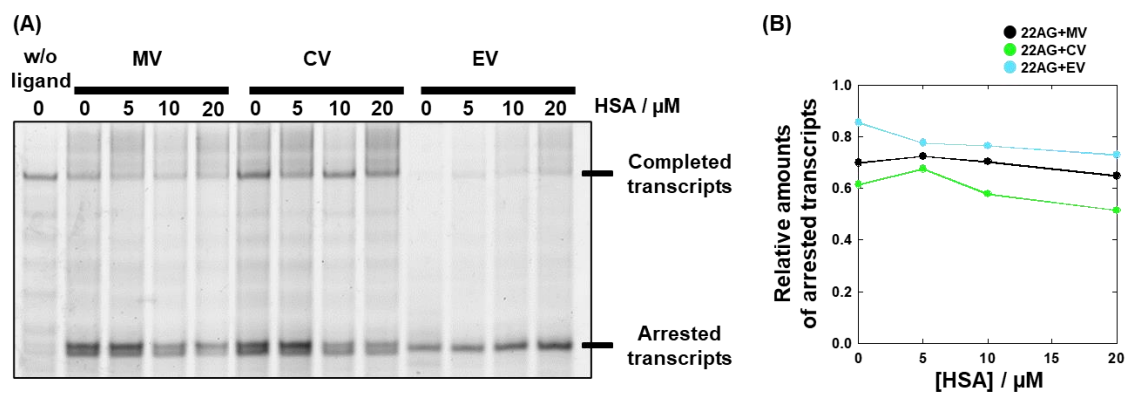

169

170 Figure S9. Denatured 10% polyacrylamide gel electrophoresis of the transcripts from 22AG template with 0, 5, 10, or 20  $\mu\text{M}$  HSA in  
 171 the presence of 100  $\mu\text{M}$  MV, CV, or EV. The transcription reactions were carried out in buffer consisting of 1 mM KCl, 40 mM Tris-  
 172 HCl (pH 7.2) for 2 hours. (B) Relative amounts of arrested transcripts versus concentration of HSA with the 22AG template in the  
 173 presence of 100  $\mu\text{M}$  MV (black), CV (green), or EV (blue).

174

175 **References**

- 176 1. N. Sugimoto, M. Nakano and S. Nakano, *Biochemistry*, 2000, **39**, 11270-11281.  
177 2. V. Gabelica, R. Maeda, T. Fujimoto, H. Yaku, T. Murashima, N. Sugimoto and D. Miyoshi,  
178 *Biochemistry*, 2013, **52**, 5620-5628.

179
